# Supplementary material for: Huangqin-tang ameliorates dextran sodium sulphate-induced colitis by regulating intestinal epithelial cell homeostasis, inflammation and immune response
Source: PubMed Central journal article supplement (PMC5159883; doi:10.1038/srep39299), 2016-12-16
Supplement: srep39299-s1.pdf [file srep39299-s1.pdf]

# **Huangqin-tang ameliorates dextran sodium sulphate-induced colitis by regulating intestinal epithelial cell homeostasis, inflammation and immune response**

Ying Zou<sup>1,3†</sup>, Jiantao Lin<sup>4†</sup>, Wenyang Li<sup>1</sup>, Zhuguo Wu<sup>5</sup>, Zhiwei He<sup>3</sup>, Guoliang Huang<sup>3</sup>, Jian Wang<sup>3</sup>, Caiguo Ye<sup>3</sup>, Xiaoyan Cheng<sup>1</sup>, Congcong Ding<sup>3</sup>, Xuebao Zheng<sup>2\*</sup> & Honggang Chi<sup>1\*</sup>

<sup>1</sup>Department of Traditional Chinese Medicine, Scientific Research Platform, The Second Clinical Medical College, Guangdong Medical University, Dongguan 523808, China

<sup>2</sup>Mathematical Engineering Academy of Chinese Medicine, Guangzhou University of Chinese Medicine, Guangzhou, 510006, China.

<sup>3</sup>Sino-American Cancer Research Institute, Key Laboratory for Medical Molecular Diagnostics of Guangdong Province, Guangdong Medical University, Dongguan 523808, China

<sup>4</sup>Traditional Chinese Medicine and New Drug Research Institute, Guangdong Medical University, Dongguan 523808, China

<sup>5</sup>The Second Clinical Medical College, Guangdong Medical University, Dongguan 523808, China

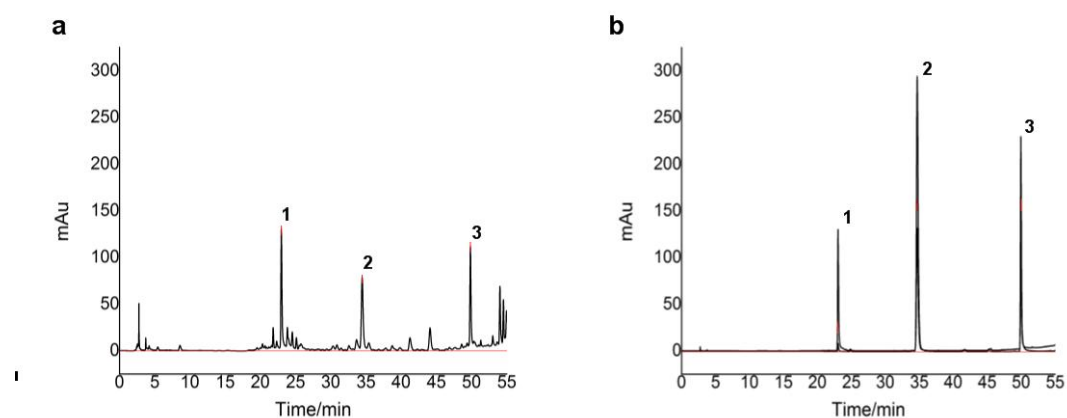

**Supplementary Figure 1.** HPLC chromatogram of main active components in an aqueous extraction of HQT. (a) aqueous extract of HQT. (b) Standards: 1, paeoniflorin; 2, baicalin; 3, baicalein.

**Supplementary Table 1** Characterisation of HQT components by HPLC

| Peak no | Component    | Molecular formula    | Content (%) |
|---------|--------------|----------------------|-------------|
| 1       | paeoniflorin | $C_{23}H_{28}O_{11}$ | 11.38       |
| 2       | baicalin     | $C_{21}H_{18}O_{11}$ | 4.23        |
| 3       | baicalein    | $C_{15}H_{10}O_5$    | 6.73        |
